# Supplementary material for: Unmasking cellular response of a bloom-forming alga to viral infection by resolving expression profiles at a single-cell level
Source: PLoS Pathog. 2019 Apr 24;15(4):e1007708. doi: 10.1371/journal.ppat.1007708 (PMC6502432; doi:10.1371/journal.ppat.1007708)
Supplement: S1 Table — (XLSX) [file ppat.1007708.s001.xlsx]

## Sheet: Table S1
Gene acronym	Gene description	Sequence ID	Biological Pathway	Host/Virus	PrimerF	PrimerR	Ref
Actin	cytoskeleton protein	Ctg4210		Host	GACCGACTGGATGGTCAAG	GCCAGCTTCTCCTTGATGTC	Rosenwasser et al., 2014
DMC1	meiosis-specific homolog of Rad51; promotes interhomolog recombination	KY224382	meiosis	Host	CAGCAGAAGCTCTCCCAGAT	GTAGAGGCGAAGGTTGACCA	Frada et al., 2017
FLAG11	flagellar inner arm intermediate chain	GS00514	meiosis	Host	TACGACGCTCCATATCCACA	TCTGGTCCTTCTCGCTGTTT	Frada et al., 2017
FLAG4	flagella dynein light chain TCTEX1; Axonemal dynein	GS08244	meiosis	Host	ACGTGTGCGATAATGCAGAA	GTCAGATCGAGAGGCCAAAG	Frada et al., 2017
FLAG8	flagellar dynein heavy chain2 DHC2 - axonemal dynein	GS00012	meiosis	Host	TACATCGACGGCTTCTTCCT	GGCACTCGTAGTCCTTCTCG	Frada et al., 2017
H2A	histone protein	GS10455	meiosis	Host	CGAGGAGCTCAACAAGTTCC	GAAACACCTGTGGGGAGAGA	Frada et al., 2017
HOP1	protein that binds DSBs and oligomerizes early during meiotic prophase, and forms axial and lateral elements of the synaptonemal complex	KY224384,KY224385	meiosis	Host	GTGGCATGAGGCTGCTCTAC	ACCTTGCCAACCATGAAGAA	Frada et al., 2017
MER3	meiosis-specific DEAD-box helicase that promotes Holliday junction resolution with crossover interference	KY224386,KY224387	meiosis	Host	GACTCGGGCATGATTGAGAT	GAAGAGGGTCATCGTCTCCA	Frada et al., 2017
MND1	functions after meiotic DSB formation, and required for stable heteroduplex DNA formation	KY224387	meiosis	Host	CTCGAGGCCGACAAGCTC	GATGAACTTCTTGCGCACCT	Frada et al., 2017
MYB	MYB Transcription factor	GS00273	meiosis	Host	AGTGAGTTTCCTGCCTGCAC	CTATCTCCGCCACACTCACA	Frada et al., 2017
SPO11-2	type II DNA topoisomerase VI subunit A (SPO11) homolog 2	XM_005781601.1	meiosis	Host	GCGCTTATGCTGTGCTACAA	GTACGGCTGGAAGGAAGTTG	Frada et al., 2017
SPO11-3	type II DNA topoisomerase VI subunit A (SPO11) homolog	CL10890Contig1	meiosis	Host	GAGGACCGCTTCTACAACGA	GCCCTTCATGTAGACGGAGA	Frada et al., 2017
PHOTO2	photoreceptor proteins - variant	GS00920	meiosis	Host	CTTCGAAGTCTCCAGCCAAG	TCCTCCGAGTACACGCTCTT	Frada et al., 2017
TUB	tublin	XM_005781568.1		Host	CGCTGTACGACATCTGCTT	GGAAGGGGATCATGTTGAC	NCBI
ALMA1	alma1	KR703620.1	DMSP biosynthesis	Host	TCAGATCGCGGCGTACTG	GCGGCAATTTGCGGATT	Alcolombri et al., 2015
CerS_1	ceramide synthase	KJ868222.1	Host Sphingolipids	Host	TCCTCGGGCAGACGTTGCAC	GCCGCCCTCGTACTCATCCG	Rosenwasser et al., 2014
DCD	dihydroceramide desaturase	KJ868223	Host Sphingolipids	Host	TGCCAGATTCTCACCTAC	GCGCTTTGATGAACATCG	Rosenwasser et al., 2014
3KSR	3-ketosohinganine reductase		Host Sphingolipids	Host	CTGCGTGATGGTCTGGAT	TGCTTGCGCTGCTTG	Rosenwasser et al., 2014
SPHD	sphinganine hydroxylase	CL6552Contig1	Host Sphingolipids	Host	GCCAGACTTCCACGACTTTCA	GAGTCGAGCCAGCCGATGT	Rosenwasser et al., 2014
SPHK	sphingosine kinase	KJ868224	Host Sphingolipids	Host	CGGCGGCTCTGCAAACT	GCTACGACGACTATCACTCTTCTCAT	Rosenwasser et al., 2014
GBA1	glucocerebrosidase	KJ868229.1	Host Sphingolipids	Host	TCCTCACCGCCTCAGTTCTC	GAGCATCGCACACCATCGT	Rosenwasser et al., 2014
GBA2	glucocerebrosidase	Ctg17003	Host Sphingolipids	Host	TGGGAGTCGTGCCTTTGG	GATGGTCCCGCACAAACG	Rosenwasser et al., 2014
UGCG1	ceramide glycosyltransferase 1	KJ868227	Host Sphingolipids	Host	GGCGCTCTCTTTCTCAGAGTAGA	GCTACCTGCCAAAACCTTAATAGC	Rosenwasser et al., 2014
UGCG2	ceramide glycosyltransferase 2	KJ868228	Host Sphingolipids	Host	TCGCAAACATGTGCAACCA	TGGGCCAGTGACAGTCGTT	Rosenwasser et al., 2014
PDH_1	dihydrolipoyllysine-residue acetyltransferase component of pyruvate dehydrogenase mitochondrial-like	est_10559	Primary Metabolism	Host	TTCACGACAAAGTCGGTCATG	GAACTGGGCGGCAATCAT	Rosenwasser et al., 2014
TPI	triosephosphate isomerase	p_3112F	Primary Metabolism	Host	AGCTCACGCCGTTCAAAGAC	CGACCAGACGGGCTCGTA	Rosenwasser et al., 2014
ADH	alcohol dehydrogenases (ADH)	22000F	Primary Metabolism	Host	CTGCGTGTGGTTGCCTAGGT	GGCATTGCAACCGTGAAAT	Rosenwasser et al., 2014
FABF	3-oxoacyl-(acyl-carrier-protein) synthase 2	est_6874F	Primary Metabolism	Host	TGCCGCAATCTCGGATAAC	CTCGTACGCCTTGAAGACGAT	Rosenwasser et al., 2014
GS	glutamine synthetase	35517	Primary Metabolism	Host	CGTGGTCACGTCGATGATCT	GTCCGCATGTTGATAAGGAAGAA	Rosenwasser et al., 2014
ENO	enolase	est_8599F	Primary Metabolism	Host	GCTGCCGTTCCAAGAGTACTTT	GATGAGCATGCCCTCCTTGA	Rosenwasser et al., 2014
MVK_1	mevalonate kinase	18373	Terpenoids biosynthesis	Host	GGATGACCACCTTTGCATGAG	GTGTCTCCTTCGCAGATTTCG	Rosenwasser et al., 2014
PMVK	phosphomevalonate kinase	Ctg3891	Terpenoids biosynthesis	Host	GAGGGAGCTGGCCATGCT	GGCGAGAAGCGGCAGTAG	Rosenwasser et al., 2014
HMG-CoA synthase	hydroxymethylglutaryl- synthase	Ctg5091	Terpenoids biosynthesis	Host	CGAAATGACTCAGGATCAGACCTT	CTCGCAGGACGCGTACCT	Rosenwasser et al., 2014
FDFT1	farnesyl diphosphate farnesyl transferase 1	Ctg11794	Terpenoids biosynthesis	Host	GTCAGCTGTGCAGAGTGTGTGA	GGTGGCATGCAGCTCTTTG	Rosenwasser et al., 2014
MVD1	diphosphomevalonate decarboxylase	Ctg16244	Terpenoids biosynthesis	Host	GCTCCCGAGCCAATCGT	TGACAAGCAGTCAGTCAGTGTGA	Rosenwasser et al., 2014
MVD2	diphosphomevalonate decarboxylase	est_893	Terpenoids biosynthesis	Host	GGACGAGTTTATGGGCAAGTTTA	ACCAACATCGCGCTGATCA	Rosenwasser et al., 2014
MVK_2	mevalonate kinase	est_3558	Terpenoids biosynthesis	Host	TGTTGGTGACCAGGACAGTCA	ATCAACGGCTGGGCCTACT	Rosenwasser et al., 2014
ChlP	geranylgeranyl reductase	8586.1	Terpenoids biosynthesis	Host	CGGACGGCGCAAACTC	CGTCTCGTCACCGACGTACA	Rosenwasser et al., 2014
ceramidase3	ceracmidase	54930	Host Sphingolipids	Host	TATGGCGGCCTTTTGACAGT	GGTATGAAAGGACCCGATTGG	Rosenwasser et al., 2014
PDH_2	pyruvate dehydrogenase E1	CL1Contig2760	Primary Metabolism	Host	CGCGCACGCTAATAAAGCCAACGGGCTAGTACACTCGAT AAAC	CCAACGGGCTAGTACACTCGAT	Rosenwasser et al., 2014
ACS	acetyl-CoA synthetase	CL602Contig1.1	Primary Metabolism	Host	CCGCCACGACCACAAAGTAC	TGCGACGCTCCGTTGAG	Rosenwasser et al., 2014
ACC2_1	acetyl-coa carboxylase	CL1089Contig1.2	Primary Metabolism	Host	CGTTCTCGTCGCCAAACG	GCGGCAACAAAGACCATCA	Rosenwasser et al., 2014
KAS III	3-oxoacyl-(acyl-carrier-protein) synthase iii	CL2862Contig1	Primary Metabolism	Host	GCGCTTGCGATTAGCAGAA	TGCACGAGGATCGGAACAG	Rosenwasser et al., 2014
Lhca	chloroplast light harvesting protein isoform 12	CL5815Contig1	Photosynthesis	Host	CGGGAAGCGAATGTCGTT	TGCACGATGTAGCCCACAAA	Rosenwasser et al., 2014
ACC2_2	acetyl-coa carboxylase	CL6830Contig1	Primary Metabolism	Host	GCGGTGGTGGTCTTTTGG	TGAATATGAGACAACCATAGTGCTTAGTG	Rosenwasser et al., 2014
PGM	phosphoglycerate mutase	CL7183Contig1	Primary Metabolism	Host	GGCGTGCTGCTCGTTGAG	GGTGCACACCTCGCTGATG	Rosenwasser et al., 2014
HMB-PPsynthase	4-hydroxy-3-methylbut-2-en-1-yl diphosphate synthase	CL7201Contig1	Terpenoids biosynthesis	Host	TGAAGGCCTCGACGAAGAAG	GTCGAGAAGATCCGCATCAAC	Rosenwasser et al., 2014
ceramidase5	alkaline phytoceramidase family protein	CL7234Contig1	Host Sphingolipids	Host	TGCGAGAGGGAAATGTTTATGA	TCTGTGCACATGTACGCTGACT	Rosenwasser et al., 2014
ceramidase1	acid ceramidase-like	CL12436Contig1	Host Sphingolipids	Host	TGGCTCCTGCTCGATCATC	CATGCTCGGTTCGCTCACT	Rosenwasser et al., 2014
CPS	carbamoyl-phosphate synthase	CL13557Contig1	Primary Metabolism	Host	GCGGCTGACGGTTCATTATAG	TGTGCAGAGATAGCACCACATG	Rosenwasser et al., 2014
ceramidase2	ceramidase	Ctg16151	Host Sphingolipids	Host	ACCACGACTATTTCACTGCTACAGTAC	CCTGTGCTCTCTGACTCTGTGGTA	Rosenwasser et al., 2014
LHC	light harvesting complex protein	est_926	Photosynthesis	Host	TGGTGGGCAATGTCGACTT	CCTCGCGCATCCACTTG	Rosenwasser et al., 2014
FCP	fucoxanthin chl a c light-harvesting protein	est_1551	Photosynthesis	Host	GCTGCGCGCCAAAGC	GCCATTGTAAAACACAGGGAGTAA	Rosenwasser et al., 2014
FabG	3-oxoacyl-[acyl-carrier-protein] reductase (NADPH) activity	est_5247	Primary Metabolism	Host	GCGGACATGTCTTCTCCTGAA	CCCACCGGATCGTCGAA	Rosenwasser et al., 2014
HMGCR	3-hydroxy-3-methyl-glutaryl-coenzyme A reductase	sing_16374	Terpenoids biosynthesis	Host	ACGGCTTTGGCCTTTGC	CCCTTATTCGCAGCCACAAAT	Rosenwasser et al., 2014
PMVK2	phosphomevalonate kinase	sing_34440	Terpenoids biosynthesis	Host	GGGCCCACCCGAGAGA	AGAGAGGTGACCAGGGTTGCT	Rosenwasser et al., 2014
ceramidase4	ceramidase	sing_52771	Host Sphingolipids	Host	GCGACGCTCATGGCTAATG	TGAAACTATGACACTGCTCTTTTGG	Rosenwasser et al., 2014
GR	glutathione reductase	XM_005781671.1	Antioxidant	Host	GCCGACCGCATCTTTGG	ACACCACCGTCGCGATGT	NCBI
GCL1	Glutamate–cysteine ligase	XM_005771044.1	Antioxidant	Host	CGCCTTCACCACCTTTGTG	GGGTGTACAGGTTCAGGTTGAAGT	NCBI
GCL2	Glutamate–cysteine ligase	XM_005775975.1	Antioxidant	Host	CACCGAGTTCCGGTCGAT	GAAGTTGAGGTTGAAGTAGAGGATGA	NCBI
CAT	Catalase	XM_005769737.1	Antioxidant	Host	CGCTCGCATCCGCTTCT	CCGCGAAGCTTGCCAAT	NCBI
GST	gst-scaffold238F	XM_005759602.1	Antioxidant	Host	TGCCGGCGATCGAGAT	CGTCCCTTCACCGCTGAAT	NCBI
GSS1	GSS_scaffold31F	XM_005774713.1	Antioxidant	Host	GGGCGGCAACAACCTCTTC	GATCCGCTCCATGAGGATGTA	NCBI
GSS2	GSS-scaffold13F	XM_005789071.1	Antioxidant	Host	ACGACTACCCCTCAAACAAGGA	GGCATTTGATGGCGAGAGA	NCBI
peroxidase1	peroxidase-70F	XM_005761657.1	Antioxidant	Host	GAAGGGTCCGATGCAGTATGA	CCTCGACGTGCTTTTTGAAAG	NCBI
peroxidase2	peroxidase-scaffold101F	XM_005793355.1	Antioxidant	Host	TTCGAGGGCGCATGGT	CAGCCCCCTCTCATAGCAGTT	NCBI
peroxidase3	peroxidase-72F	XM_005761235.1	Antioxidant	Host	CACTTGCGGATGGACATCTTC	CCGAAAGCGCGACAATCT	NCBI
peroxidase4	peroxidase-206F	XM_005781154.1	Antioxidant	Host	GGGCGCCAAGCATATCC	GCTCCACTCAGAGCGACAATC	NCBI
MnSod2	superoxide dismutase	27201	Antioxidant	Host	CCTTAACGCGGCAATCGT	TTCCAGCGCCGACAAACT	Rosenwasser et al., 2014
MnSod1	superoxide dismutase	p_6954	Antioxidant	Host	GCCGCCACCATGAAGTTC	CCGCCATCGCCTTGTTC	Rosenwasser et al., 2014
NiSod2	superoxide dismutase	CL13218Contig1	Antioxidant	Host	CTCGACACGGCCATCGA	AGCGGCTACCTCAGCAGCTA	Rosenwasser et al., 2014
NiSod1	superoxide dismutase	17330	Antioxidant	Host	TCTCACAGCCAGTTTCGATTTC	TTTGGTCTCCGGGTCTAGGA	Rosenwasser et al., 2014
APX	ascorbate peroxidase	sing_CL13826Contig1	Antioxidant	Host	CGGCCTTCAAGTCGATCGT	TGGTCCAAGCGGACACAA	Rosenwasser et al., 2014
NADPHO2	nadph oxidase	contig_94386	Antioxidant	Host	TTGCATGCATGTAGTGTTCAATACA	ACGAGATCAAGTGAAGAAAATATGGA	Rosenwasser et al., 2014
NADPHO1	nadph oxidase	sing_20581	Antioxidant	Host	GACGTGCTCGTCGACATCCT	CCCGTGATGTACGTGTTCAGTT	Rosenwasser et al., 2014
GPAT1	glycerol-3-phosphate o-acyltransferase	CL2132Contig1	TAG biosynthesis	Host	GTACGTGTTTGCATGAGAGTATACCA	GACCGTTTTTTCATGAGGAGAGA	Rosenwasser et al., 2014
GPAT2	glycerol-3-phosphate o-acyltransferase	CL2132Contig1	TAG biosynthesis	Host	GTACGTGTTTGCATGAGAGTATACCA	GACCGTTTTTTCATGAGGAGAGA	Rosenwasser et al., 2014
DGAT1a	diacylglycerol acyltransferase	CL3099Contig2	TAG biosynthesis	Host	CGGCTTCTACGTCTTTTTCCA	GCAAATTCCACAGCCTCCAGTA	Rosenwasser et al., 2014
DGAT2a	2-acylglycerol o-acyltransferase 2	CL1Contig2693	TAG biosynthesis	Host	CGTATGCACGTTGCGTTGTAG	GCCATTTGCGTGGTTCCT	Rosenwasser et al., 2014
DGAT2b	2-acylglycerol o-acyltransferase 2	CL1Contig128	TAG biosynthesis	Host	CACACGTTGCTGTCTAAAATGAGA	GGCTCGGCTCGAGACTGA	Rosenwasser et al., 2014
DGAT2c	diacylglycerol o-acyltransferase 2-like protein 6	4803	TAG biosynthesis	Host	AAACACACTTCGGGTGTACAGTTG	TGGCCAGCGGGAAATCT	Rosenwasser et al., 2014
GPAT3	glycerol-3-phosphate acyltransferase	Ctg13912	TAG biosynthesis	Host	TTGAGATGTTCCGGCTCATG	CGGGCAGATCGGGTAGGT	Rosenwasser et al., 2014
PAP	phosphatidic acid phosphatase family protein	contig_18349	TAG biosynthesis	Host	TGGCGAAAGCAGCATAAGTG	AGCCTCTCTTACTTTGCAGTCTTCTT	Rosenwasser et al., 2014
DGAT3	diacylglycerol o-acyltransferase 2-like	61789	TAG biosynthesis	Host	TGAAGCCTGCGCAAAGC	GAGGCAGAGCGGCTCAAG	Rosenwasser et al., 2014
PDAT	phospholipid:diacylglycerol acyltransferase	est_1308	TAG biosynthesis	Host	ATGCCGCGCCCTTTGT	CGGTCTTGTACCCGTTTTCC	Rosenwasser et al., 2014
LPAAT1_1	lysophosphatidylcholine acyltransferase 2	Ctg15347.2	TAG biosynthesis	Host	GGCATCTCGTAATAGGTCCAAAA	CGCAGTTCAAGGCGTCAAG	Rosenwasser et al., 2014
LPAAT1_2	alpha beta-hydrolase	51698	TAG biosynthesis	Host	CGTTCGCGGAGCTTTCTC	GAATCGCAAATTCACGCAAA	Rosenwasser et al., 2014
Hlpp2-R	sphingosine 1-phosphate phosphatase	Ctg5145	Host Sphingolipids	Host	GACCCGCTAAAGAGCAAGCA	ACGTACCCCGCCAAAGAAC	Rosenwasser et al., 2014
VPS34	Phosphatidylinositol 3-kinase	XM_005776756.1	Autophagy	Host	TGCGTCGCCATGTACTTGAT	GATATAGCCAAAGTCGATGTGGAA	Rosenwasser et al., 2014
ATG2	autophagy-related protein 2	41840	Autophagy	Host	CGTGTTTGTCGAGCTGTGTGA	AAAGGCGTAGAGGGAGGAGAA	Rosenwasser et al., 2014
ATG3	autophagy-related protein 3	sing_5056.2	Autophagy	Host	AGTTGCCGCATGGTTTTCTT	GCCTGACATCGCTGATGAGA	Shemi et al., 2015
ATG5	autophagy-related protein 5	CL15121Contig1	Autophagy	Host	GCGAGGGTAGGTCCAGCA	GAGAAGCTACTGGTACTGCGGTTT	Shemi et al., 2015
ATG7	ubiquitin-like modifier-activating enzyme atg7-like	p_469	Autophagy	Host	CCACACGTCACACGTACCTGTA	GGTGGCGTCGTTATACGTTAAAA	Shemi et al., 2015
ATG8a	autophagy protein 8a	BK008760.1	Autophagy	Host	CGGCCAGTTTGTGTACGTGAT	GCCTGCTCGGGCTTGA	Shemi et al., 2015
ATG8b	autophagy protein 8b	BK008760	Autophagy	Host	CAGCAGGTCAACAGCCATCA	TCAAACGGGTGGTCCTTCTT	Shemi et al., 2015
ATG12	autophagy protein 12	contig_102498	Autophagy	Host	GCAGTGCTTTCAGACGGGCT	CCGACGCTGTTCGTCACC	Shemi et al., 2015
TOR1	target of rapamycin	manually defined	Autophagy	Host	CGCATGTAGAAATACCTTGAGCA	GTAACTCACTGACACGGTGACAGG	Shemi et al., 2015
eTOR3	target of rapamycin	manually defined	Autophagy	Host	TGGAACCCGTTTTGGTGAGA	ACTGAACTTCACAAAGGTCAAAGCA	Shemi et al., 2015
VPE	vacuolar protease	455379	Host Stress/PCD	Host	TGCTGCAGTCGACCAAGCT	TCCGTGGTCCACAAAGTTGA	Read et al, 2013
metacaspase1	metacaspase	457813	Host Stress/PCD	Host	TGTCCCTGCAGCCACATG	TGCTTTTTGGTAGCCACTCGTAT	Read et al, 2013
metacaspase2	metacaspase	440238	Host Stress/PCD	Host	CGCGCAAGCGAAGAAGAT	GGACGGTTCGAGTTCATGGT	Read et al, 2013
CerS	longevity-assurance family protein	est_12413	Host Sphingolipids	Host	ACCCTCGCTGTCAAGGTGA	GTAGATCCAAGGCAGCTCCTCA	Rosenwasser et al., 2014
SPT	serine palmitoyltransferase	sing_12600	Host Sphingolipids	Host	ACTGATTTCCTCCGCATGAC	CGATGCCAAACGAGTAGATG	Rosenwasser et al., 2014
SNase	staphylococcal nuclease domain-containing protein 1	40811.1	Host Stress/PCD	Host	TCGCAGGACAACGAGTGGTAC	TGCCGTAGTCGAGGAAGAAGA	Rosenwasser et al., 2014
DSP	hypothetical death-specific protein with Ca binding EF hand domain	450300	Host Stress/PCD	Host	GCGAGGCGCTGCAAGA	CAACCTGCTTCTCGTCCAAAA	Read et al, 2013
Phytaspase1	Subtilisin-related vacuolar protease, an alkaline serine protease	442731	Host Stress/PCD	Host	CCCTCCTAACGGGATGAACTT	CGTAGGTGAGCTCGCACGA	Read et al, 2013
Phytaspase2	subtilase activity	445142	Host Stress/PCD	Host	TCCACCAAGGATGCAGTCAC	TCAAACTTGTTGTAGAGCAGCTTGT	Read et al, 2013
EhV138	hypothetical protein	YP_293891.1		Viral	CCAATGGAAGGATTATCTGAGAAAA	CACATTAGAACGTGCGTTGATCA	NCBI
EPVG_00010	hypothetical protein	AET97898.1		Viral	ACGATAGTCATATTATTGCCATGCA	ACCATATCTCTTTCTTTCATTGCTTTC	NCBI
EPVG_00025	ribonucleoside-diphosphate reductase small subunit	AET97913.1	RNR	Viral	CTATGATGCTACAGTCACTCGTAGAAGAT	TCTGCCTTGTTCTTAATTGATTGAA	NCBI
EPVG_00062	RNA polymerase subunit beta	AET97950.1	RNA polymerase	Viral	TCGTATTCCAAAACCTGAATCAATT	TCTATCTTTAAACGATGCGGACTCT	NCBI
EhV121	hypothetical protein	YP_293875.1		Viral	CGAGCTATGCGAGCATGGTA	GCATTGACTGAGTTGGAAGTGATAA	NCBI
EPVG_00014	dihydroceramide synthase	AET97902.1	Viral Sphingolipids	Viral	AGGCGGTGTATCGTATTCATATT	GCTACGGCATATATCGGTTTCG	NCBI
EPVG_00075	fatty acid elongase	AET97963.1	Viral Sphingolipids	Viral	TTGGTATCATCATCTAACGGTTCTTC	ACGGAATATGCATGCCAACA	NCBI
EPVG_00077	sphingosine 1-phosphate phosphatase	AET97965.1	Viral Sphingolipids	Viral	TATTTTTATTCGTGGGTGCAAGTC	GTGGATGATGCCAGAAATCGT	NCBI
EPVG_00085	membrane protein	AET97973.1	Viral Sphingolipids	Viral	TACTCATTATGGATGCATTCATGTATTT	TGATGTGCTCCATGCGATG	NCBI
EPVG_00031	sterol desaturase	AET97919.1	Viral Sphingolipids	Viral	TCCATACGCAGCTCATGCTC	TTTGCTGCAATAATCCATGTTAGTG	NCBI
ERCC-00039	Spike				TTAGAAGCCGTGACCGAACAG	CCGCCCCCGAGAATACA
ERCC-00040	Spike				TTTTCCCGATCGGCTTCAT	TCCCGTCCGAGCTTAAACG
ERCC-00044	Spike				CATCGCACGCGTCGAA	TCTCCGTGCCCGATCCTA
ERCC-00054	Spike				TTGGAGGAGAGATTTGCCAATC	CAAAGCCCTCGCTATAGCAACT
ERCC-00058	Spike				GGAGCCACTTTCTGCGAATT	TCTCCGCAGAAGATAGTATGTTGATC
ERCC-00071	Spike				GCCGTCCTTAAGTGCTTACGA	GGTCATGCTGCTCCGTGAA
ERCC-00074	Spike				CTTCCCATCTTCTTTGAGAGTTGTT	GCCTTATGTGATAGATGCCTCTTTAA
ERCC-00076	Spike				CCCTGCGGTGCCTTAGC	CCGTGTCTAGCGAGAATAACCA
ERCC-00084	Spike				GAATCTACTGCAGAACTATGGGTTTG	CGGCCACGCTCCTATGTT
ERCC-00099	Spike				ATTTACACATCTAGCAGTCAGTTCTTGTT	TGCATCTATACACTCCGGAATGG
ERCC-00111	Spike				GCCTCGTCTGAACACAAGAGAGA	TTTCGCTTACATGCCATATGCT
ERCC-00113	Spike				CTGTGGATTGCCGGCATT	CGACGGGTCCGAGACATTA
ERCC-00120	Spike				CGGCTTAGATGTGCCTAGAAGGT	ATGTGTGACAAGCCTGCTTTAACT
ERCC-00143	Spike				ACGCATACTGGTCCACATATAGACA	TTTAGGAGACGCTCGTGCTATGTA
ERCC-00145	Spike				GAAACGGGTCACTCCATCGA	AGTCATGCGTATGCGCTTCTAC
ERCC-00157	Spike				GGTGCCGCTCCCAAATC	GCTGTGACCGCCTCTAACATG
ERCC-00162	Spike				CCTCTCCTTGGCAAACAACTCTA	ACATGAGAGATTAGCAAAAGCAACA
