# Supplementary material for: Unmasking cellular response of a bloom-forming alga to viral infection by resolving expression profiles at a single-cell level
Source: PLoS Pathog. 2019 Apr 24;15(4):e1007708. doi: 10.1371/journal.ppat.1007708 (PMC6502432; doi:10.1371/journal.ppat.1007708)
Supplement: S3 Table — Genes with significant altered expression in susceptible versus resistant strains (p-values <0.05 of hurdle test) are presented. (XLSX) [file ppat.1007708.s003.xlsx]

## Sheet: Table S3
Gene	Fold change (log2)	Delta percent expressed	P-values (hurdle )
CCMP2090_R1 versus CCMP2090
Actin	3.98164	-3.94737	4.2397e-09
DMC1	3.18066	-25.731	0.00444679
FLAG11	3.06196	-24.4152	0.0013725
FLAG4	3.63983	-40.6433	4.39011e-06
H2A	3.98973	-69.4444	1.29269e-10
HOP1	-1.88217	26.0234	0.000164029
MER3	3.06222	-63.3041	3.68551e-09
MYB	3.91461	-32.3099	5.58468e-05
ALMA1	1.48507	-0.146199	0.00751626
CerS	2.46578	-20.7602	0.00329389
DCD	4.05618	-17.1053	7.52081e-09
3KSR	4.60047	-68.4211	4.18392e-09
SPHD	2.6386	-28.9474	0.00103407
GBA2	2.34748	-11.9883	0.00159358
UGCG1	2.5244	-31.7251	0.032996
UGCG2	2.44976	-28.8012	0.0376875
PDH	1.84171	-44.883	0.00066277
TPI	6.17746	-40.7895	2.22352e-15
ADH	-4.05176	61.8421	6.33791e-08
FABF	3.95325	-36.8421	5.21203e-06
GS	2.00679	-13.5965	0.0377001
MVK	3.83642	-33.6257	5.48106e-05
PMVK	-2.51498	35.3801	0.0075679
HMG-CoA synthase	2.39855	-27.0468	0.016894
FDFT1	2.24818	-2.63158	0.000751457
MVD1	5.37904	-30.2632	7.00125e-12
MVD2	3.60822	-14.4737	4.18949e-11
ChlP	2.93098	-28.8012	0.000113213
ceramidase3	5.58018	-10.5263	2.182e-20
PDH2	3.0704	-33.9181	0.00469901
ACC2	2.39714	-19.883	0.0326481
Lhca	-3.34213	40.4971	1.36305e-05
PGM	1.93554	-19.883	0.048382
CPS	2.74853	-32.3099	0.000954736
LHC	2.40535	-30.7018	0.00759494
FCP	2.98131	-30.2632	0.000491851
HMGCR	-2.20892	37.8655	0.00241362
PMVK2	1.98019	-15.0585	0.0154527
ceramidase4	-3.27399	48.3918	9.14013e-06
GCL2	3.35896	-25.1462	0.000151794
GSS1	1.10525	-7.89474	0.0163055
GSS2	3.52949	-41.8129	0.000728918
peroxidase4	2.65888	-36.1111	0.0141054
MnSod1	3.98244	-52.7778	0.000107264
NADPHO2	4.21097	-28.9474	7.26785e-06
GPAT1	-2.49479	24.5614	0.0111409
DGAT1a	3.80649	-31.2865	0.000245919
DGAT2a	4.55469	-41.8129	3.25386e-05
DGAT2b	2.00018	-12.2807	0.0125948
GPAT3	-2.08081	28.2164	0.0449627
PAP	3.0236	-22.807	0.000583923
PDAT	3.19493	-28.9474	0.000469844
LPAAT1	3.45782	-38.8889	0.00159426
Hlpp2-R	2.20216	-21.7836	0.0448694
Atg8a-F	2.36164	-19.152	0.00236189
H_vpe	2.04602	-11.8421	0.0236167
metacaspase1	1.55251	-31.4327	0.0366006
metacaspase2	3.74566	-19.7368	1.70477e-13
SNase	3.51317	-34.7953	2.36727e-05
Phytaspase1	1.26135	-29.2398	0.0338723
Phytaspase2	2.64245	-38.3041	0.00468301
